# Supplementary material for: The RelB subunit of NFκB acts as a negative regulator of circadian gene expression
Source: PubMed Central journal article supplement — Cell Cycle. 2012 Sep 1;11(17):3304–11. doi: 10.4161/cc.21669 (PMC3467027; doi:10.4161/cc.21669), 2012-09-01
Supplement: cc-11-3304-s01.pdf [file cc-11-3304-s01.pdf]

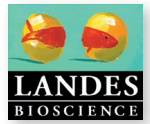

## **Supplemental Material to:**

**Marina M. Bellet, Loredana Zocchi  
and Paolo Sassone-Corsi**

**The RelB subunit of NF $\kappa$ B acts as a negative regulator of  
circadian gene expression**

**2012; 11(17)**

**<http://dx.doi.org/10.4161/cc.21669>**

**<http://www.landesbioscience.com/journals/cc/article/21669>**

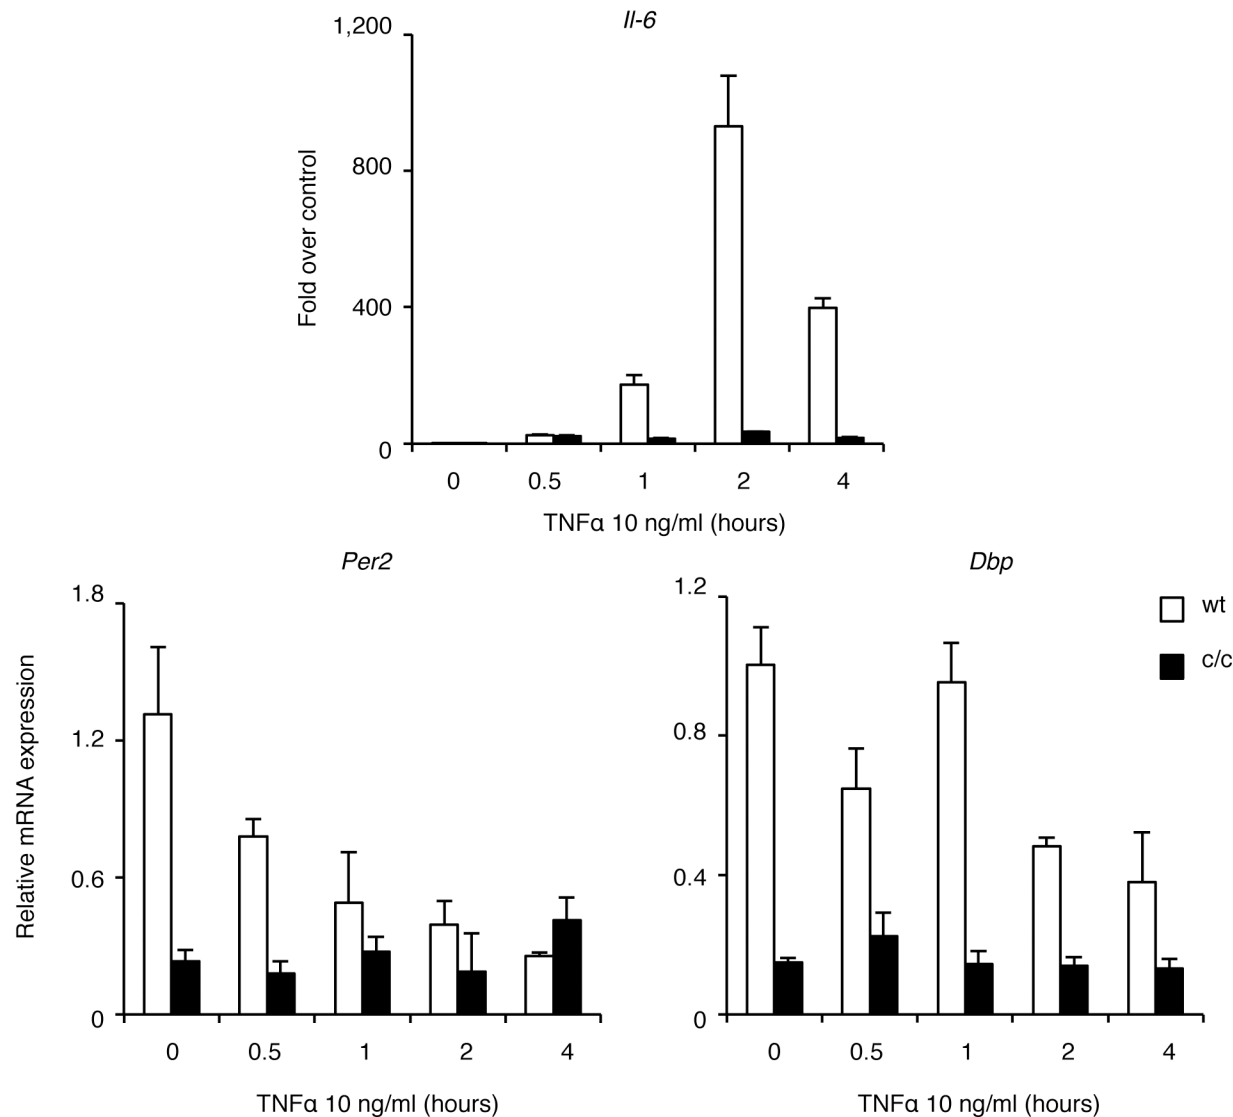

**Figure S1.** Time course of *Il-6*, *Per2* and *Dbp* mRNA expression after TNF- $\alpha$  stimulation (1  $\mu$ g/ml) of wt and *Clock* mutant (c/c) MEFs, measured by quantitative real time PCR. For *Il-6*, fold changes in gene expression compared to unstimulated cells are shown. For *Per2* and *Dbp*, time 0 (unstimulated cells) was set to 1. All the values are the mean  $\pm$  SD (n=3).

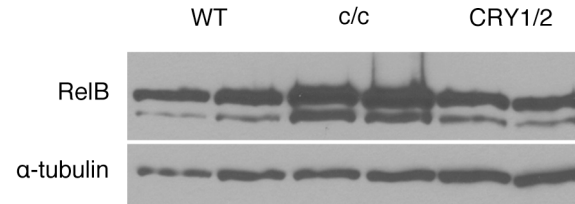

**Figure S2** Endogenous RelB expression in wild type (WT), *Clock* mutant (*c/c*) and CRY1/2 KO (CRY1/2) MEFs was determined by western blot.  $\alpha$ -tubulin was used as loading control.

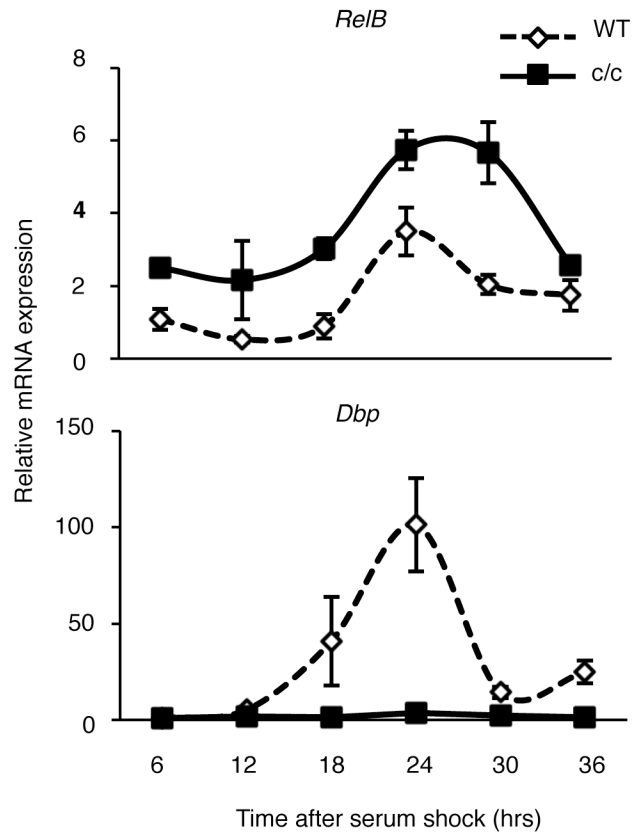

**Figure S3.** RNA was prepared at the indicated times after serum shock synchronization of WT and *c/c* MEFs, reverse transcribed, and real-time PCR was performed using primers for *RelB*, *Dbp* and  $\beta$ -actin. Data is represented as relative levels of *RelB* and *Dbp* normalized to  $\beta$ -actin. Time 6 in wt cells was set to 1. All the values are the mean  $\pm$  SD (n=3).

**A**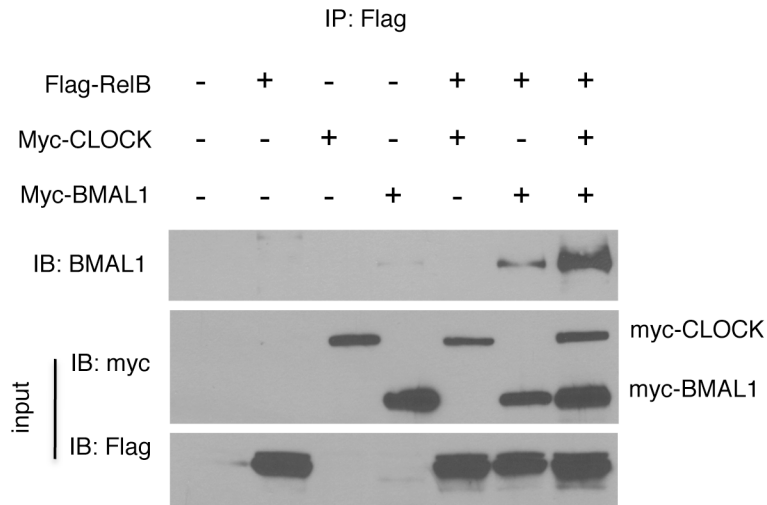**B**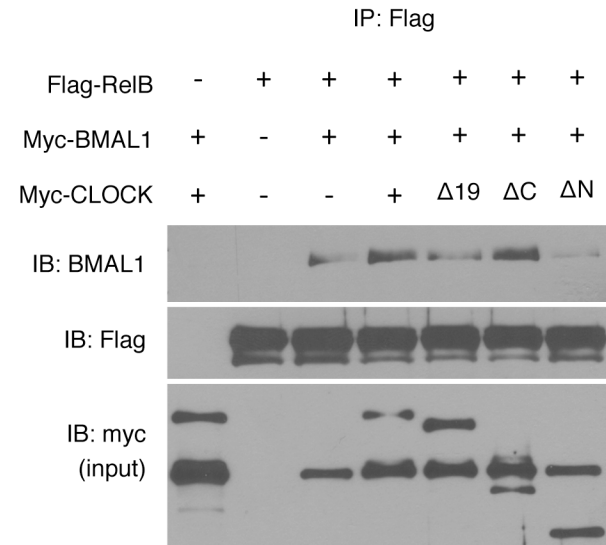

**Figure S4 (A)** HEK-293 cells were cotransfected with a series of expression vectors as described. After immunoprecipitation using FLAG-Agar, levels of coimmunoprecipitated proteins was detected by western blot analysis with anti-BMAL1 antibody. Lower panel shows the expression of myc-tagged proteins (CLOCK and BMAL1) and Flag-tagged proteins (RelB) in total cell lysates as an input. **(B)** HEK-293 cells were cotransfected with a series of expression vectors as described. After immunoprecipitation using FLAG-Agar, levels of coimmunoprecipitated proteins was detected by western blot analysis with anti-BMAL1 and anti-Flag antibodies. Lower panel shows the expression of myc-tagged proteins (CLOCK and BMAL1) in total cell lysates as an input.

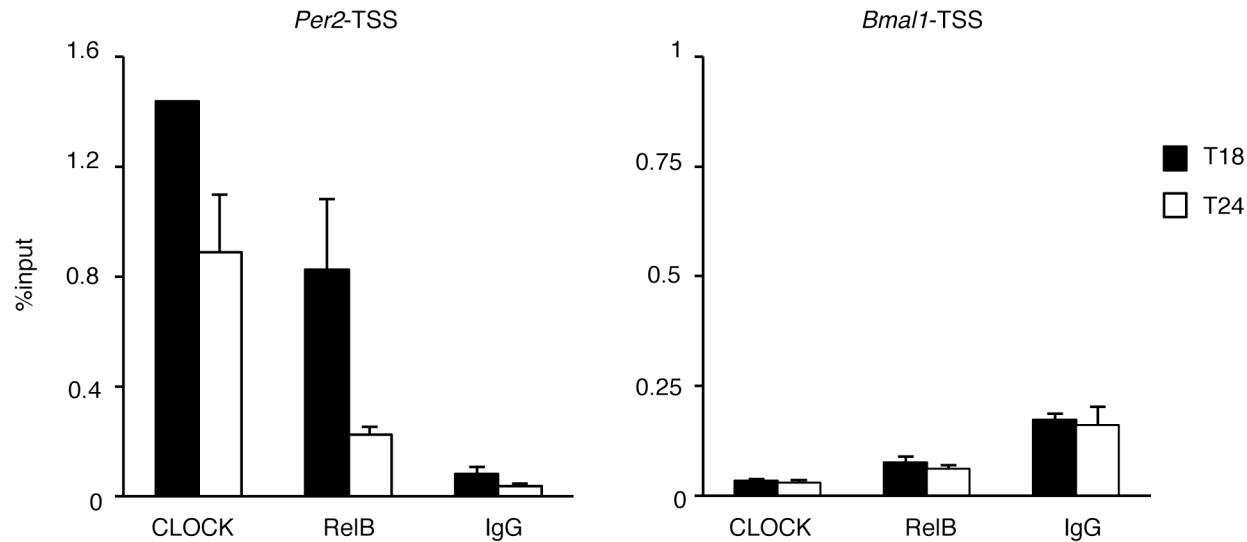

**Figure S5** RelB is recruited with CLOCK and BMAL1 at clock-controlled genes (CCGs) promoters. Cross-linked cell extracts were isolated at the indicated time points after serum shock from MEFs. The samples were subjected to ChIP assay with anti-CLOCK, anti-RelB and anti-IgG, and analyzed by quantitative PCR with primers for **(A)** *Per* promoter (*Per2* TSS) and **(B)** *Bmal1* promoter (*Bmal1* TSS). Control IgG were used as control for immunoprecipitation. All the values are the mean  $\pm$  SD (n=3).

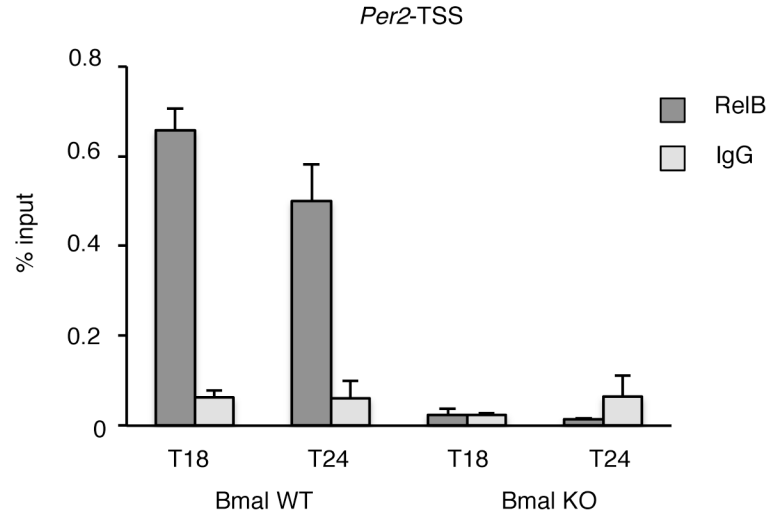

**Figure S6.** RelB recruitment at CCGs promoters is BMAL1-dependent. Cross-linked cell extracts were isolated at the indicated time points after serum shock from *Bmal1* WT and KO MEFs. The samples were subjected to ChIP assay with anti-RelB and anti-IgG, and analyzed by quantitative PCR with primers for *Per* promoter (*Per2* TSS). Control IgG were used as control for immunoprecipitation.

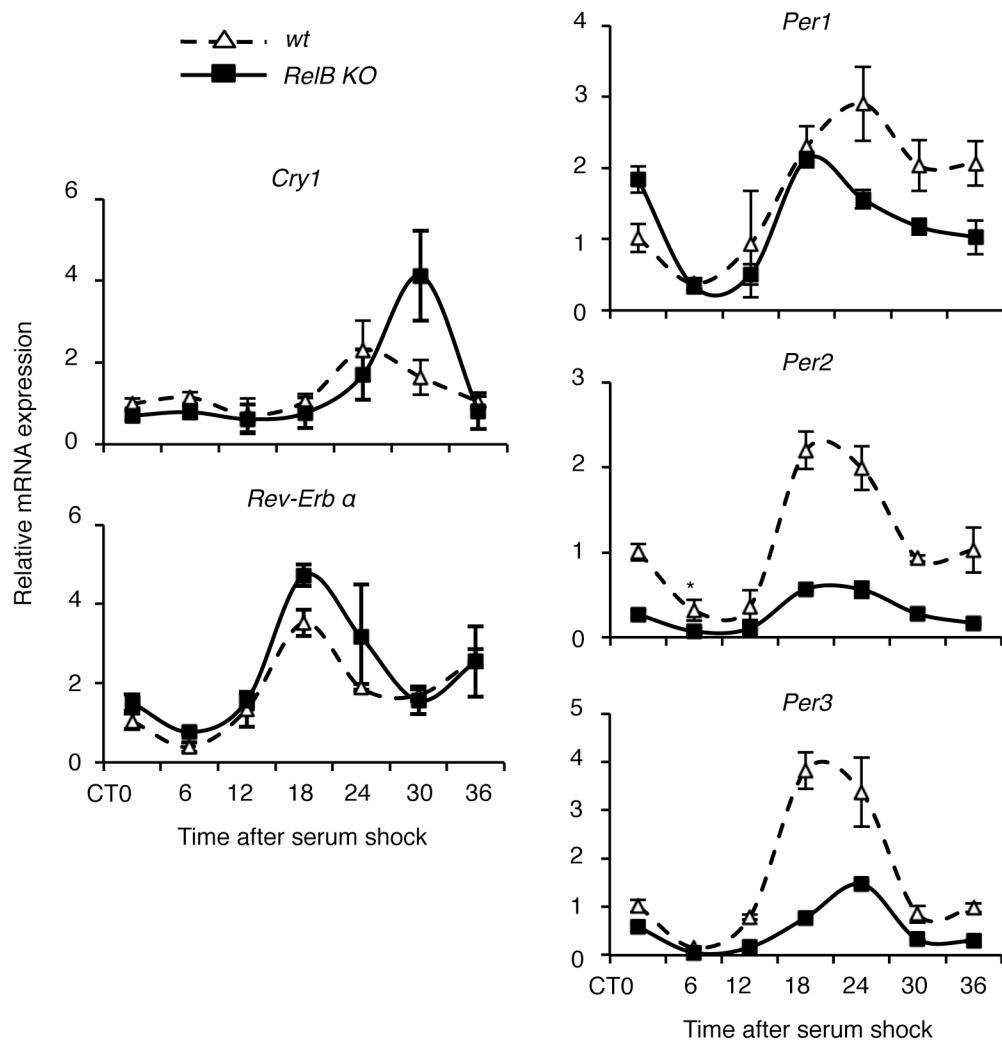

**Figure S7.** Altered circadian expression of clock genes and CCGs in WT and RelB KO MEFs. RNA was prepared at the indicated times after serum shock synchronization, reverse transcribed, and real-time PCR was performed using primers for *Cry1*, *Rev-erba*, *Per1*, *Per2*, *Per3* and  $\beta$ -actin. The values are relative to those of  $\beta$ -actin mRNA levels at each CT (circadian time). Time 0 (unsynchronized cells, CT0) in wt cells was set to 1. All the values are the mean  $\pm$  SD (n=3).
